# Supplementary material
Source: PubMed Central journal article supplement (PMC3243309)
Supplement: NIHMS97375-supplement-Supp_Info.pdf [file NIHMS97375-supplement-Supp_Info.pdf]

**Supp. Table S1. TGM1 Germline Mutations Associated with ARCI**

| Number | Nucleotide change <sup>a</sup><br>NM_000359.2 | Amino acid change <sup>b</sup><br>NP_000350 | Exon/<br>intron | Mutation<br>type | References                          | Alleles <sup>c</sup>                                                       |
|--------|-----------------------------------------------|---------------------------------------------|-----------------|------------------|-------------------------------------|----------------------------------------------------------------------------|
| 1      | c.1-1G>C                                      | ND                                          | Intron 1        | Splice Site      | This report                         | Compound heterozygous<br>(c.1-1G>C/c.877-2A>G)                             |
| 2      | c.125C>A                                      | p.Ser42Tyr                                  | Exon 2          | Missense         | Huber et al.<br>[1995a]             | Compound heterozygous<br>(S42Y/R142C/R323Q)                                |
| 3      | c.157T>A                                      | p.Cys53Ser                                  | Exon 2          | Missense         | Hennies et al.<br>[1998a]           | Compound heterozygous<br>(C53S/c.877-2A>G)                                 |
| 4      | c.160C>T                                      | p.Arg54X                                    | Exon 2          | Nonsense         | This report                         | Homozygous<br>Patient 13                                                   |
| 5      | c.232C>T                                      | p.Arg78X                                    | Exon 2          | Nonsense         | Parmentier et al.<br>[1995]         | Homozygous                                                                 |
| 6      | c.281G>A                                      | p.Gly94Asp                                  | Exon 2          | Missense         | Cserhalmi-Friedman et al.<br>[2001] | Heterozygous                                                               |
| 7      | c.305A>T                                      | p.Asp102Val <sup>d</sup>                    | Exon 2          | Missense         | Yang et al.<br>[2001]               | Compound heterozygous<br>(D102V/ R307W )                                   |
| 8      | c.316C>T                                      | p.Arg106X                                   | Exon 2          | Nonsense         | Esposito et al.<br>[2007]           | Homozygous                                                                 |
| 9      | c.342dupT <sup>e</sup>                        | Val115CysfsX21                              | Exon 3          | Frameshift       | Farasat et al.<br>[2008]            | Heterozygous                                                               |
| 10     | c.370C>T                                      | p.Gln124X                                   | Exon 3          | Nonsense         | This report                         | Compound heterozygous<br>(Q124X/R126C)                                     |
| 11     | c.374delA <sup>f</sup>                        | p.Asn125ThrfsX15                            | Exon 3          | Frameshift       | Akiyama et al.<br>[2003]            | Homozygous                                                                 |
| 12     | c.376C>T                                      | p.Arg126Cys                                 | Exon 3          | Missense         | Oji et al.<br>[2006]                | Compound heterozygous<br>(R126C/R142H)                                     |
| 13     | c.377G>A                                      | p.Arg126His                                 | Exon 3          | Missense         | Farasat et al.<br>[2008]            | Compound heterozygous<br>(R126H/L235X)                                     |
| 14     | c.379C>T                                      | p.Arg127X                                   | Exon 3          | Nonsense         | Schorderet et al.<br>[1997]         | Homozygous                                                                 |
| 15     | c.401A>G                                      | p.Tyr134Cys                                 | Exon 3          | Missense         | Farasat et al.<br>[2008]            | Compound heterozygous<br>(Y134C/W263X) (Y134C/R396H)<br>(Y134C/c.1331dupA) |
| 16     | c.408_411dupCGAC <sup>g</sup>                 | p.Glu138ArgfsX21                            | Exon 3          | Frameshift       | Bichakjian et al.<br>[1998]         | Compound heterozygous<br>(c.408_411dupCGAC/<br>c.1225_1226del AC)          |
| 17     | c.424C>T                                      | p.Arg142Cys                                 | Exon 3          | Missense         | Huber et al.<br>[1995a]             | Compound heterozygous<br>(S42Y/R142C/R323Q)                                |
| 18     | c.425G>A                                      | p.Arg142His <sup>h</sup>                    | Exon 3          | Missense         | Russell et al.<br>[1995]            | Homozygous                                                                 |
| 19     | c.425G>C                                      | p.Arg142Pro                                 | Exon 3          | Missense         | Cserhalmi-Friedman et al.<br>[2001] | Compound heterozygous<br>(R142P/ Q582X)                                    |
| 20     | c.427C>T                                      | p.Arg143Cys <sup>i</sup>                    | Exon 3          | Missense         | Laiho et al.<br>[1997]              | Homozygous<br>Compound heterozygous<br>(R143C/V379L) (R142H/R143C)         |
| 21     | c.428G>A                                      | p.Arg143His <sup>j</sup>                    | Exon 3          | Missense         | Russell et al.<br>[1995]            | Homozygous                                                                 |
| 22     | c.430G>A                                      | p.Gly144Arg                                 | Exon 3          | Missense         | Hennies et al.<br>[1998b]           | Compound heterozygous<br>(G144R/c.877-2A>G)                                |
| 23     | c.431G>A                                      | p.Gly144Glu <sup>k</sup>                    | Exon 3          | Missense         | Petit et al.<br>[1997]              | Homozygous                                                                 |
| 24     | c.479C>G                                      | p.Ser160Cys                                 | Exon 3          | Missense         | Cserhalmi-Friedman et al.<br>[2001] | Heterozygous                                                               |
| 25     | c.566dupG                                     | p.Ser190GlnfsX49                            | Exon 4          | Frameshift       | Farasat et al.<br>[2008]            | Compound heterozygous<br>(c.566dupG/c.877-2A>G)                            |
| 26     | c.579G>A                                      | p.Trp193X                                   | Exon 4          | Nonsense         | Farasat et al.<br>[2008]            | Compound heterozygous<br>(W193X/N330H)                                     |
| 27     | c.614T>A                                      | p.Leu205Gln <sup>l</sup>                    | Exon 4          | Missense         | Akiyama et al.<br>[2001b]           | Compound heterozygous<br>(L205Q/R307W)                                     |
| 28     | c.625G>T                                      | p.Val209Phe                                 | Exon 4          | Missense         | This report                         | Compound heterozygous<br>(R143C/V209F)                                     |
| 29     | c.652G>A                                      | p.Gly218Ser <sup>m</sup>                    | Exon 4          | Missense         | Laiho et al.<br>[1997]              | Compound heterozygous<br>(G218S/R395L)                                     |

| Number | Nucleotide change <sup>a</sup><br>NM_000359.2 | Amino acid change <sup>b</sup><br>NP_000350 | Exon/<br>intron | Mutation<br>type | References                       | Alleles <sup>c</sup>                                                  |
|--------|-----------------------------------------------|---------------------------------------------|-----------------|------------------|----------------------------------|-----------------------------------------------------------------------|
| 30     | c.674G>A                                      | p.Arg225His                                 | Exon 4          | Missense         | Hennies et al. [1998b]           | Compound heterozygous (R225H/G382R)                                   |
| 31     | c.674G>C                                      | p.Arg225Pro                                 | Exon 4          | Missense         | This report                      | Compound heterozygous (R225P/c.877-2A>G)                              |
| 32     | c.679C>T                                      | p.Gln227X                                   | Exon 4          | Nonsense         | Farasat et al. [2008]            | Homozygous                                                            |
| 33     | c.704T>A                                      | p.Leu235X                                   | Exon 4          | Nonsense         | Farasat et al. [2008]            | Compound heterozygous (R126H/L235X)                                   |
| 34     | c.728T>G                                      | p.Ile243Ser                                 | Exon 4          | Missense         | Farasat et al. [2008]            | Compound heterozygous (I243S/R315H)                                   |
| 35     | c.746C>T                                      | p.Pro249Leu <sup>n</sup>                    | Exon 4          | Missense         | Tok et al. [1999]                | Compound heterozygous (P249L/F400V)                                   |
| 36     | c.788G>A                                      | p.Trp263X                                   | Exon 5          | Nonsense         | Hennies et al. [1998a]           | Homozygous                                                            |
| 37     | c.790C>T                                      | p.Arg264Trp                                 | Exon 5          | Missense         | Oji et al. [2006]                | Compound heterozygous (R264Q/c.877-2A>G)                              |
| 38     | c.791G>A                                      | p.Arg264Gln                                 | Exon 5          | Missense         | Oji et al. [2006]                | Compound heterozygous (R264Q/c.1074delC)                              |
| 39     | c.802delG                                     | p.Val268PhefsX63                            | Exon 5          | Frameshift       | This report                      | Compound heterozygous (c.802delG/R323Q)                               |
| 40     | c.814T>C                                      | p.Ser272Pro                                 | Exon 5          | Missense         | Esposito et al. [2001]           | Compound heterozygous (S272P/c.877-2A>G)                              |
| 41     | c.826T>A                                      | p.Tyr276Asn                                 | Exon 5          | Missense         | Oji et al. [2006]                | Homozygous                                                            |
| 42     | c.832G>C                                      | p.Gly278Arg                                 | Exon 5          | Missense         | Cserhalmi-Friedman et al. [2001] | Compound heterozygous (G278R/R286Q)                                   |
| 43     | c.853G>A                                      | p.Glu285Lys                                 | Exon 5          | Missense         | This report                      | Compound heterozygous (E285K/A560G)                                   |
| 44     | c.857G>A                                      | p.Arg286Gln                                 | Exon 5          | Missense         | Cserhalmi-Friedman et al. [2001] | Compound heterozygous (G278R/R286Q)                                   |
| 45     | c.866A>C                                      | p.Asn289Thr <sup>o</sup>                    | Exon 5          | Missense         | Yang et al. [2001]               | Compound heterozygous (N289T/R307W)                                   |
| 46     | c.872G>A                                      | p.Gly291Asp                                 | Exon 5          | Missense         | Farasat et al. [2008]            | Compound heterozygous (G291D/R315H)                                   |
| 47     | c.876+2T>C                                    | ND                                          | Intron 5        | Splice Site      | Farasat et al. [2008]            | Compound heterozygous (c.876+2T>C/c.877-2A>G)                         |
| 48     | c.877-2A>G <sup>p</sup>                       | p.Phe293SerfsX38<br>or<br>p.Phe293ValfsX2   | Intron 5        | Splice Site      | Huber et al. [1995a]             | Homozygous                                                            |
| 49     | c.877T>G                                      | p.Phe293Val                                 | Exon 6          | Missense         | This report                      | Compound heterozygous (c.877-2A>G/F293V)                              |
| 50     | c.882_888del<br>CCACGGG                       | p.Asp294Glu <sup>s</sup> X34                | Exon 6          | Frameshift       | Farasat et al. [2008]            | Compound heterozygous (c.882_888delCCACGGG/R389P)                     |
| 51     | c.910A>T                                      | p.Ile304Phe                                 | Exon 6          | Missense         | This report                      | Homozygous                                                            |
| 52     | c.919C>T                                      | p.Arg307Trp <sup>q</sup>                    | Exon 6          | Missense         | Akiyama et al. [2001b]           | Compound heterozygous (L205Q/R307W)                                   |
| 53     | c.919C>G                                      | p.Arg307Gly                                 | Exon 6          | Missense         | Oji et al. [2006]                | Compound heterozygous (c.877-2A>G/R307G) (R307G/R389P)                |
| 54     | c.932dupC                                     | p.Tyr312IlefsX23                            | Exon 6          | Frameshift       | Farasat et al. [2008]            | Compound heterozygous (c.408_411dupCGAC/c.932dupC)                    |
| 55     | c.943C>T                                      | p.Arg315Cys                                 | Exon 6          | Missense         | Huber et al. [1997]              | Compound heterozygous (c.877-2A>G/R315C)                              |
| 56     | c.944G>T                                      | p.Arg315Leu                                 | Exon 6          | Missense         | Tok et al. [1999]                | Homozygous                                                            |
| 57     | c.944G>A                                      | p.Arg315His                                 | Exon 6          | Missense         | Oji et al. [2006]                | Homozygous                                                            |
| 58     | c.967C>T                                      | p.Arg323Trp                                 | Exon 6          | Missense         | This report                      | Compound heterozygous (c.877-2A>G/R323W)                              |
| 59     | c.968G>A                                      | p.Arg323Gln                                 | Exon 6          | Missense         | Huber et al. [1995a]             | Heterozygous Two patients<br>Compound heterozygous (S42Y/R142C/R323Q) |
| 60     | c.984+1G>A                                    | ND                                          | Intron 6        | Splice Site      | This report                      | Compound heterozygous with (c.882_888delCCACGGG/c.984+1G>A/E520G)     |

| Number | Nucleotide change <sup>a</sup><br>NM_000359.2 | Amino acid change <sup>b</sup><br>NP_000350 | Exon/<br>intron | Mutation<br>type | References                       | Alleles <sup>c</sup>                                              |
|--------|-----------------------------------------------|---------------------------------------------|-----------------|------------------|----------------------------------|-------------------------------------------------------------------|
| 61     | c.988A>C                                      | p.Asn330His                                 | Exon 7          | Missense         | Farasat et al. [2008]            | Compound heterozygous (W193X/N330H)                               |
| 62     | c.991T>C                                      | p.Ser331Pro                                 | Exon 7          | Missense         | Farasat et al. [2008]            | Compound heterozygous (S331P/c.1420_1421insA)                     |
| 63     | c.1024T>C                                     | p.Trp342Arg                                 | Exon 7          | Missense         | This report                      | Compound heterozygous (c.877-2A>G/W342R)                          |
| 64     | c.1042C>T                                     | p.Arg348X                                   | Exon 7          | Nonsense         | Kon et al. [2003]                | Compound heterozygous (R348X/Y365D)                               |
| 65     | c.1074C>G                                     | p.Ser358Arg                                 | Exon 7          | Missense         | Huber et al. [1997]              | Compound heterozygous (S358R/c.2088+1G>T) (S358R/V379L)           |
| 66     | c.1074delC                                    | p.Ser358ArgfsX26                            | Exon 7          | Frameshift       | Oji et al. [2006]                | Compound heterozygous (R264Q/c.1074delC)                          |
| 67     | c.1075G>A                                     | p.Val359Met                                 | Exon 7          | Missense         | This report                      | Compound heterozygous (V359M/G291D)                               |
| 68     | c.1093T>G                                     | p.Tyr365Asp                                 | Exon 7          | Missense         | Kon et al. [2003]                | Compound heterozygous (R348X/Y365D)                               |
| 69     | c.1097T>C                                     | p.Leu366Pro                                 | Exon 7          | Missense         | This report                      | Compound heterozygous (G291D/L366P)                               |
| 70     | c.1107dupA                                    | p.Tyr370IlefsX61                            | Exon 7          | Frameshift       | Farasat et al. [2008]            | Compound heterozygous (c.877-2A>G/c.1107dupA)                     |
| 71     | c.1135G>C                                     | p.Val379Leu                                 | Exon 7          | Missense         | Huber et al. [1997]              | Compound heterozygous (S358R/V379L)                               |
| 72     | c.1144G>A                                     | p.Gly382Arg<br>or p.Gly382Ser               | Exon 7          | Missense         | Hennies et al. [1998b]           | Compound heterozygous (R225H/G382R)                               |
| 73     | c.1147G>A                                     | p.Val383Met <sup>†</sup>                    | Exon 7          | Missense         | Petit et al. [1997]              | Homozygous                                                        |
| 74     | c.1159+1G>T                                   | ND                                          | Intron 7        | Splice Site      | This report                      | Homozygous                                                        |
| 75     | c.1166G>C                                     | p.Arg389Pro                                 | Exon 8          | Missense         | Shevchenko et al. [2000]         | Compound heterozygous (c.877-2A>G/R389)                           |
| 76     | c.1166G>A                                     | p.Arg389His <sup>‡</sup>                    | Exon 8          | Missense         | Akiyama et al. [2001a]           | Compound heterozygous (R389H/c.2114delA)                          |
| 77     | c.1175G>A                                     | p.Gly392Asp                                 | Exon 8          | Missense         | Cserhalmi-Friedman et al. [2001] | Heterozygous                                                      |
| 78     | c.1186C>A                                     | p.Arg396Ser                                 | Exon 8          | Missense         | Mizrachi-Koren et al. [2006]     | Homozygous                                                        |
| 79     | c.1187G>T                                     | p.Arg396Leu <sup>†</sup>                    | Exon 8          | Missense         | Laiho et al. [1997]              | Compound heterozygous (G218S/R396L) (V379L/R396L)<br>Heterozygous |
| 80     | c.1187G>A                                     | p.Arg396His                                 | Exon 8          | Missense         | Farasat et al. [2008]            | Compound heterozygous (Y134C/R396H)                               |
| 81     | c.1201T>G                                     | p.Phe401Val <sup>¶</sup>                    | Exon 8          | Missense         | Tok et al. [1999]                | Compound heterozygous (P249L/F401V)                               |
| 82     | c.1213C>A                                     | p.His405Asn                                 | Exon 8          | Missense         | This report                      | Compound heterozygous (R389P/H405N)                               |
| 83     | c.1223_1227delACACA                           | p.Asp408ValfsX21                            | Exon 8          | Frameshift       | This report                      | Homozygous<br>Compound heterozygous (R106X / c.1223_1227delACACA) |
| 84     | c.1225_1226delAC <sup>v</sup>                 | p.Thr409IlefsX21                            | Exon 8          | Frameshift       | Bichakjian et al. [1998]         | Compound heterozygous (c.408_411dupCGAC/ c.1225_1226delAC)        |
| 85     | c.1261A>G                                     | p.Met421Val                                 | Exon 8          | Missense         | This report                      | Compound heterozygous (c.877-2A>G/M421V)                          |
| 86     | c.1264A>T                                     | p.Lys422X                                   | Exon 8          | Nonsense         | Cserhalmi-Friedman et al. [2001] | Compound heterozygous (W263X/K422X)                               |
| 87     | c.1289A>T                                     | p.Asp430Val                                 | Exon 8          | Missense         | Pigg et al. [2000]               | Compound heterozygous (V379L/D430V)                               |
| 88     | c.1297delT <sup>w</sup>                       | p.Trp433GlyfsX11                            | Exon 8          | Frameshift       | Huber et al. [1995a]             | Homozygous                                                        |
| 89     | c.1303T>G                                     | p.Phe435Val                                 | Exon 9          | Missense         | This report                      | Homozygous                                                        |
| 90     | c.1313G>A                                     | p.Trp438X                                   | Exon 9          | Nonsense         | Rice et al. [2005]               | Heterozygous                                                      |

| Number | Nucleotide change <sup>a</sup><br>NM_000359.2 | Amino acid change <sup>b</sup><br>NP_000350 | Exon/<br>intron | Mutation<br>type | References                       | Alleles <sup>c</sup>                           |
|--------|-----------------------------------------------|---------------------------------------------|-----------------|------------------|----------------------------------|------------------------------------------------|
| 91     | c.1331dupA <sup>x</sup>                       | p.Arg445GlufsX9                             | Exon 9          | Frameshift       | Farasat et al. [2008]            | Compound heterozygous (Y134C/c.1331dupA)       |
| 92     | c.1417G>A                                     | p.Gly473Ser                                 | Exon 10         | Missense         | Huber et al. [1997]              | Compound heterozygous (G473S/R687C)            |
| 93     | c.1420_1421insA <sup>y</sup>                  | p.Pro474HisfsX24                            | Exon 10         | Frameshift       | Farasat et al. [2008]            | Compound heterozygous (S331P/c.1420_1421insA)  |
| 94     | c.1469A>G                                     | p.Asp490Gly                                 | Exon 10         | Missense         | Raghunath et al. [2003]          | Compound heterozygous (G278R/D490G)            |
| 95     | c.1512C>G                                     | p.Tyr504X <sup>z</sup>                      | Exon 11         | Nonsense         | Becker et al. [2003]             | Compound heterozygous (Y504X/S670X)            |
| 96     | c.1555G>T                                     | p.Glu519X                                   | Exon 11         | Nonsense         | Esposito et al. [2007]           | Homozygous                                     |
| 97     | c.1559A>G                                     | p.Glu520Gly                                 | Exon 11         | Missense         | Esposito et al. [2001]           | Homozygous                                     |
| 98     | c.1631A>G                                     | p.Tyr544Cys                                 | Exon 11         | Missense         | Farasat et al. [2008]            | Homozygous                                     |
| 99     | c.1645+1G>A                                   | ND                                          | Intron11        | Splice Site      | Farasat et al. [2008]            | Heterozygous                                   |
| 100    | c.1679C>G                                     | p.Ala560Gly                                 | Exon 12         | Missense         | This report                      | Compound heterozygous (E285K/A560G)            |
| 101    | c.1744C>T                                     | p.Gln582X                                   | Exon 12         | Nonsense         | Cserhalmi-Friedman et al. [2001] | Compound heterozygous (R142P/Q582X)            |
| 102    | c.1984C>T                                     | p.Gln662X <sup>ab</sup>                     | Exon 13         | Nonsense         | Jessen et al. [2000]             | Homozygous                                     |
| 103    | c.2009C>G                                     | p.Ser670X <sup>ac</sup>                     | Exon 13         | Nonsense         | Becker et al. [2003]             | Compound heterozygous (Y504X/S670X)            |
| 104    | c.2059delC <sup>ad</sup>                      | p.Arg687ValfsX64                            | Exon 13         | Frameshift       | Lugassy et al. [2007]            | Homozygous                                     |
| 105    | c.2059C>T                                     | p.Arg687Cys                                 | Exon 13         | Missense         | Huber et al. [1997]              | Compound heterozygous (G473S/R687C)            |
| 106    | c.2060G>A                                     | p.Arg687His                                 | Exon 13         | Missense         | Oji et al. [2006]                | Homozygous                                     |
| 107    | c.2065C>T                                     | p.Arg689Cys                                 | Exon 13         | Missense         | This report                      | Heterozygous                                   |
| 108    | c.2066G>A                                     | p.Arg689His                                 | Exon 13         | Missense         | This report                      | Compound heterozygous (R348X/R689H)            |
| 109    | c.2088+1G>T                                   | p.Val679_Thr696del                          | Intron 13       | Splice Site      | Huber et al. [1997]              | Compound heterozygous (S358R/c.2088+1G>T)      |
| 110    | c.2090T>G                                     | p.Leu697X                                   | Exon 14         | Nonsense         | Farasat et al. [2008]            | Compound heterozygous (R315H/L687X)            |
| 111    | c.2114delA <sup>ac</sup>                      | p.Gln705ArgfsX46                            | Exon 14         | Frameshift       | Akiyama et al. [2001a]           | Compound heterozygous (R389H/c.2114delA)       |
| 112    | c.2226-2A>G                                   | ND                                          | Intron 14       | Splice Site      | This report                      | Compound heterozygous (c.877-2A>G/c.2226-2A>G) |
| 113    | c.2278C>T                                     | p.Arg760X                                   | Exon 15         | Nonsense         | Shevchenko et al. [2000]         | Compound heterozygous (c.877-2A>G/R760X)       |
| 114    | c.2290C>T                                     | p.Arg764Cys                                 | Exon 15         | Missense         | Mizrachi-Koren et al. [2006]     | Homozygous                                     |
| 115    | c.2320C>T                                     | p.Gln774X                                   | Exon 15         | Nonsense         | Esposito et al. [2007]           | Homozygous                                     |

**TGMI Polymorphisms**

| Number | Nucleotide change <sup>a</sup><br>NM_000359.2 | Amino acid change <sup>b</sup> | Exon/ intron | References                             |
|--------|-----------------------------------------------|--------------------------------|--------------|----------------------------------------|
| 1      | c.726G>A <sup>af</sup>                        | NA                             | Exon 4       | Huber et al. [1995b]                   |
| 2      | c.877-3C>G <sup>ag</sup>                      | NA                             | Intron 5     | Huber et al. [1995b]                   |
| 3      | c.1146C>A                                     | NA                             | Exon 7       | Hennies et al. [1998b] and this report |
| 4      | c.1552G>A                                     | p.Val518Met                    | Exon 11      | Hennies et al. [1998b]                 |

<sup>a</sup>The nucleotide numbering is based on the published GenBank sequence NM\_000359.2, and nucleotide +1 is the adenine of the ATG initiation codon.

<sup>b</sup>The amino acid sequence is taken from the published GenBank sequence NP\_000350 and begins with the translation initiation codon as 1.

<sup>c</sup>*TGM1* alleles of affected patients in the first report of each mutation. Alleles and number of patients are indicated.

<sup>d</sup>Mutation was reported as p.D101V in Yang et al. [2001].

<sup>e</sup>Mutation was reported as c.343insT in Farasat et al. [2008].

<sup>f</sup>Mutation was reported as c.371delA in Akiyama et al. [2003].

<sup>g</sup>Mutation was reported as 1387insCAGC in Bichakjian et al. [1998].

<sup>h</sup>Mutation was reported as p.Arg141His in Russell et al. [1995].

<sup>i</sup>Mutation was reported as p.Arg142Cys in Laiho et al. [1997].

<sup>j</sup>Mutation was reported as p.Arg142His in Russell et al. [1995].

<sup>k</sup>Mutation was reported as p.Gly143Glu in Petit et al. [1997].

<sup>l</sup>Mutation was reported as p.Leu204Gln in Akiyama et al. [2001b].

<sup>m</sup>Mutation was reported as p.Gly217Ser in Laiho et al. [1997].

<sup>n</sup>Mutation was reported as p.Pro248Leu in Tok et al. [1999].

<sup>o</sup>Mutation was reported as p.Asn288Thr in Yang et al. [2001].

<sup>p</sup>Mutation was reported as +3366A>G in Huber et al. [1995].

<sup>q</sup>Mutation was reported as p.Arg306Trp in Akiyama et al. [2001b].

<sup>r</sup>Mutation was reported as p.Val382Met in Petit et al. [1997].

<sup>s</sup>Mutation was reported as p.Arg388His in Akiyama et al. [2001a].

<sup>t</sup>Mutation was reported as p.Arg395Leu in Laiho et al. [1997].

<sup>u</sup>Mutation was reported as p.Phe400Val in Tok et al. [1999].

<sup>v</sup>Mutation was reported as 4561delAC in Bichakjian et al. [1998].

<sup>w</sup>Mutation was reported as +4640delT in Huber et al. [1995].

<sup>x</sup>Mutation was reported as c.1331insA in Farasat et al. [2008].

<sup>y</sup>Mutation was reported as c.1421insA in Farasat et al. [2008].

<sup>z</sup>Mutation was reported as p.Tyr503X in Becker et al. [2003].

<sup>ab</sup>Mutation was reported as p.Q661X in Jessen et al. [2000].

<sup>ac</sup>Mutation was reported as p.S669X in Becker et al. [2003].

<sup>ad</sup>Mutation was reported as c.2058delC in Lugassay et al. [2007].

<sup>ae</sup>Mutation was reported as 9008delA in Akiyama et al. [2001a].

<sup>af</sup>Polymorphism was reported as +2698 G>A in Huber et al. [1995b].

<sup>ag</sup>Polymorphism was reported as +3365G>C in Huber et al. [1995b].

NA, not applicable ND, not determined

Supp. Table S2. Reported TGase-1 activity in cultured keratinocytes from patient biopsies

| Mutation (Patient)                               | Membrane activity | %          | Cytosolic activity | %       | Control (Membrane/ Cytosolic)                                | Domain                                      |
|--------------------------------------------------|-------------------|------------|--------------------|---------|--------------------------------------------------------------|---------------------------------------------|
| Unaffected heterozygote R307W <sup>a</sup> (I-1) | 1007.52 ± 104.29  | (52)       | 305.96 ± 110.18    | (56)    | (NA/ NA)                                                     | Catalytic core                              |
| Unaffected heterozygote D102V <sup>a</sup> (I-2) | 939.12 ± 205.91   | (48)       | 284.07 ± 92.63     | (52)    | (NA/ NA)                                                     | β-sandwich                                  |
| R307W/D102V <sup>a</sup> (II-2)                  | 102.41 ± 27.28    | (5)        | 82.32 ± 42.12      | (15)    | (NA/ NA)                                                     | Catalytic core/<br>β-sandwich               |
| Homozygous V383M <sup>b</sup> (B5)               | 186.2 ± 78.7      | (4; 6)     | 26.5 ± 6.7         | (5; 7)  | (5282 ± 387/<br>547.7 ± 44.9);<br>(2980 ± 592/ 358.9 ± 59.8) | Catalytic core                              |
| S358R/ V379L <sup>c</sup> (LI-20 II-1)           | 175.4 ± 44.0      | (4)        | 76.3 ± 5.5         | (22)    | (4200.0 ± 200.0/<br>351.9 ± 125.7)                           | Catalytic core/<br>Catalytic core           |
| Homozygous c.877-2G>A <sup>d</sup> (LI-2.10)     | 6.5 ± 3.0         | (3; 3)     | 1.1 ± 0.3          | (4; 6)  | (247 ± 57/ 29.3 ± 2.4);<br>(221 ± 97/ 19.2 ± 3.2)            | Intron 5                                    |
| Homozygous c.877-2G>A <sup>d</sup> (LI-2.9)      | 6.3 ± 1.0         | (3; 3)     | 0.72 ± 0.1         | (2; 4)  | (247 ± 57/ 29.3 ± 2.4);<br>(221 ± 97/ 19.2 ± 3.2)            | Intron 5                                    |
| S42Y/R142Cys/ R323Gln <sup>d</sup> (LI-3.7)      | 5.0 ± 1.0         | (2; 2)     | 1.95 ± 0.4         | (7; 10) | (247 ± 57/ 29.3 ± 2.4);<br>(221 ± 97/ 19.2 ± 3.2)            | Anchoring/<br>β-sandwich/<br>Catalytic core |
| Homozygous c.1297delT <sup>d</sup> (LI-1.5)      | 4.0               | (2; 2)     | 0.33               | (1; 2)  | (247 ± 57/ 29.3 ± 2.4);<br>(221 ± 97/ 19.2 ± 3.2)            | Catalytic core                              |
| R315C/ c.877-2A>G <sup>c</sup> (LI-22 IV.4)      | 52.0 ± 4.9        | (1)        | 4.0 ± 2.4          | (1)     | (4200.0 ± 200.0/<br>351.9 ± 125.7)                           | Catalytic core/<br>Intron 5                 |
| S42Y/R142Cys/ R323Gln <sup>d</sup> (LI-3.8)      | 1.8 ± 1.0         | (0.7; 0.8) | 1.90 ± 1.4         | (6; 10) | (247 ± 57/ 29.3 ± 2.4);<br>(221 ± 97/ 19.2 ± 3.2)            | Anchoring/<br>β-sandwich/<br>Catalytic core |
| G473S/ R687C <sup>c</sup> (LI-11 II.1)           | 24.3 ± 7.3        | (0.6)      | 10.9 ± 2.2         | (3)     | (4200.0 ± 200.0/<br>351.9 ± 125.7)                           | Catalytic core/<br>B-Barrel 1               |
| Homozygous R127X <sup>c</sup> (LI-8 II.2)        | 13.9 ± 1.8        | (0.3)      | 5.8 ± 1.1          | (2)     | (4200.0 ± 200.0/<br>351.9 ± 125.7)                           | β-Sandwich                                  |
| Homozygous G144E <sup>b</sup> (1)                | 10.1 ± 1.9        | (0.2; 0.3) | 14.4 ± 9.4         | (3; 4)  | (5282 ± 387/<br>547.7 ± 44.9);<br>(2980 ± 592/ 358.9 ± 59.8) | β-Sandwich                                  |
| S358R/ c.2088+1G>T <sup>c</sup> (LI-20 III.2)    | 4.0 ± 1.9         | (0.1)      | 5.6 ± 2.1          | (2)     | (4200.0 ± 200.0/<br>351.9 ± 125.7)                           | Catalytic core/<br>β-Barrel 2               |
| S358R/ c.2088+1G>T <sup>c</sup> (LI-20 III.1)    | 2.2 ± 0.3         | (0.05)     | 2.0 ± 1.1          | (0.6)   | (4200.0 ± 200.0/<br>351.9 ± 125.7)                           | Catalytic core/<br>β-Barrel 2               |

<sup>a</sup>Patients with these mutations diagnosed with LI and reported as mean ± S.E. [Yang et al., 2001]

<sup>b</sup>Patients with these mutations diagnosed with LI and reported as mean ± SEM [Petit et al., 1997]

<sup>c</sup>Patients with these mutations diagnosed with LI and reported as mean ± S.E. [Huber et al., 1997]

<sup>d</sup>Patients with these mutations diagnosed with LI and reported as mean ± S.D. [Huber et al., 1995a]

Units expressed as pmol of <sup>3</sup>H-putrescine incorporated into dimethylcaseine per hour per mg of protein, except for those reported by Huber et al., 1995a which are expressed as disintegrations per minute per milligram of protein × 10<sup>-4</sup>. The % of control activities are given to the right of both columns reporting the cytosolic and membrane activities. If more than one control is used then a semicolon separates the two percentages relative to the control values as well as the control values themselves. Activity assays were all similar and done by a protocol previously described [Lichti et al., 1985].

**Supp. Table S3. Reported TGase-1 Activity in Sf9 cells transfected with a baculovirus vector**

| <b>Mutation</b>          | <b>Membrane</b> | <b>%</b> | <b>Cytosolic</b> | <b>%</b> | <b>Control<br/>(Membrane/<br/>Cytosolic)</b> | <b>Domain</b>  |
|--------------------------|-----------------|----------|------------------|----------|----------------------------------------------|----------------|
| R315L <sup>a</sup>       | 13.0 ± 14.5     | 222      | 33.6 ± 10.8      | 200      | (5.9 ± 1.6/<br>16.8 ± 6.7)                   | Catalytic core |
| S42Y <sup>a</sup>        | 11.4 ± 3.3      | 182      | 74.4 ± 12        | 442      | (5.9 ± 1.6/<br>16.8 ± 6.7)                   | Anchoring      |
| D490G <sup>b,c</sup>     | 4.7 ± 2.8       | 85       | 12.5 ± 2.4       | 81       | (5.5 ± 2.0/<br>15.5 ± 5.6)                   | Catalytic core |
| R323Q <sup>a</sup>       | 1.5 ± 1.2       | 26       | 12.2 ± 2.4       | 72       | (5.9 ± 1.6/<br>16.8 ± 6.7)                   | Catalytic core |
| R143H <sup>a</sup>       | <0.01           | 0        | 3.4 ± 0.1        | 20       | (5.9 ± 1.6/<br>16.8 ± 6.7)                   | β-Sandwich     |
| R142H <sup>a</sup>       | <0.01           | 0        | 0.5 ± 0.1        | 3        | (5.9 ± 1.6/<br>16.8 ± 6.7)                   | β-Sandwich     |
| G278R <sup>b,d</sup>     | -               | 0        | 0.3 ± 0.1        | 2        | (5.5 ± 2.0/<br>15.5 ± 5.6)                   | Catalytic core |
| R142C <sup>a</sup>       | <0.01           | 0        | <0.01            | 0        | (5.9 ± 1.6/<br>16.8 ± 6.7)                   | β-Sandwich     |
| c.1297del T <sup>a</sup> | <0.01           | 0        | <0.01            | 0        | (5.9 ± 1.6/<br>16.8 ± 6.7)                   | Catalytic core |

<sup>a</sup>Patients with these mutations diagnosed with LI and reported as mean ± S.D. [Candi et al., 1998].

<sup>b</sup>Patients with these mutations diagnosed with SHCB; analysis done under ambient pressure [Raghunath et al., 2003].

<sup>c</sup>Under increased ambient pressure, +115mmHg, the protein had the following activities: membrane 4.7 ± 0.9 (39%), cytosolic 0.8 ± 0.5 (22%), control 12.2 ± 2.5/ 3.7 ± 1.1 (100%) [Raghunath et al., 2003].

<sup>d</sup>Under increased ambient pressure, +115mmHg, the protein had the following activities: membrane 0.2 ± 0.2 (2%), cytosolic – (0%), control 12.2 ± 2.5/ 3.7 ± 1.1 (100%) [Raghunath et al., 2003].

Units expressed as pmol of [<sup>14</sup>C] putrescine incorporated into succinylated casein/h/pmol of TGase 1. The % of control activities are given to the right of both columns reporting the cytosolic and membrane activities. If more than one control is used then a “–” separates the two percentages relative to the control values as well as the control values themselves. The specific activity protocols were all similar and done by a protocol previously described [Candi et al., 2003].
